# Supplementary material for: Rad-Bio-App: a discovery environment for biologists to explore spaceflight-related radiation exposures
Source: PubMed Central journal article supplement (PMC8113475; doi:10.1038/s41526-021-00143-x), 2021-05-11
Supplement: 41526_2021_143_MOESM1_ESM.pdf [file 41526_2021_143_MOESM1_ESM.pdf]

| Accession                                            | Dose Rate<br>(mGy/day) | Dosimeter                  | Reference | Description                                                                                  |
|------------------------------------------------------|------------------------|----------------------------|-----------|----------------------------------------------------------------------------------------------|
| APOLLO (AVG)                                         | 0.43                   | RSM                        | 1         | Average for Apollo astronauts' personal dosimeters                                           |
| Lunar Orbit (AVG 2010-2020)                          | 0.197                  | CRaTER                     | 2         | Includes high intensity stochastic events                                                    |
| Lunar Orbit (Min 2010-2020)                          | 0.189                  | CRaTER                     | 2         |                                                                                              |
| Lunar Orbit (AVG 2009)                               | 0.204                  | CRaTER                     | 3         | Excludes high energy stochastic events                                                       |
| Lunar Orbit (AVG 2013)                               | 0.372                  | CRaTER                     | 4         | Excludes high energy stochastic events                                                       |
| Lunar Orbit (AVG 2018)                               | 0.195                  | CRaTER                     | 3         | Excludes high energy stochastic events                                                       |
| Lunar Surface (Charged particle)                     | 0.245                  | LND                        | 5         |                                                                                              |
| Lunar Surface (Total)                                | 0.318                  | LND                        | 5         |                                                                                              |
| Lunar Surface (Neutral particle)                     | 0.074                  | LND                        | 5         |                                                                                              |
| Mars Surface Silicon (AVG)                           | 0.209                  | RAD (Si)                   | 6         | Excludes high energy stochastic event                                                        |
| Mars Surface Silicon (Max)                           | 0.227                  | RAD (Si)                   | 6         | Excludes high energy stochastic event                                                        |
| Mars Surface Silicon (Min)                           | 0.178                  | RAD (Si)                   | 6         |                                                                                              |
| Mars Transit Silicon in water (AVG)                  | 0.481                  | RAD (Si)                   | 7         | Si detector value corrected for penetration in water, excludes stochastic high energy events |
| Mars Transit (AVG) Plastic                           | 0.881                  | RAD (plastic)              | 7         | Average extracted from data in Zeitlin et al (2013), includes high energy stochastic events  |
| Mars Transit (AVG) Silicon                           | 0.63                   | RAD (Si)                   | 7         | Average extracted from data in Zeitlin et al (2013), includes high energy stochastic events  |
| Mars Transit (Max) Plastic                           | 2.977                  | RAD (plastic)              | 7         | Includes high intensity stochastic events                                                    |
| Mars Transit (Max) Silicon                           | 2.872                  | RAD (Si)                   | 7         | Includes high intensity stochastic events                                                    |
| Mars Transit (Min) Plastic                           | 0.411                  | RAD (plastic)              | 7         |                                                                                              |
| Mars Transit (Min) Silicon                           | 0.092                  | RAD (Si)                   | 7         |                                                                                              |
| Mars Transit Plastic (AVG) stochastic events removed | 0.461                  | RAD (plastic)              | 7         | Excludes high intensity stochastic events                                                    |
| Mars Transit Silicon (AVG) stochastic events removed | 0.33                   | RAD (Si)                   | 7         | Excludes high intensity stochastic events                                                    |
| Stratosphere balloon (AVG)                           | 0.064                  | TID, Liulin, RaySure, TEPC | 8         | Average value multiple dosimeters                                                            |

**Supplementary Table 1. Mars-, Moon- and high-altitude balloon-related data imported into the Rad-Bio-App.** AVG, average dose rate over time; CRaTER, Cosmic Ray Telescope for the Effects of Radiation instrument on the Lunar Reconnaissance Orbiter; Liulin, dosimeter-spectrometer from the Bulgarian Academy of Sciences; LND, Lunar Lander Neutrons and Dosimetry mounted on the Chang'E 4 lunar lander; RAD, Radiation Assessment Detector on the Mars Science Laboratory with either a silicon (Si) or plastic (plastic) detector; RaySure, detector provided by the University of Surrey; RSM, radiation survey meter; TEPC, tissue equivalent proportional counter; TID, total ionizing dose. References: 1. Cucinotta, F. A., Hamada, N. & Little, M. P. No evidence for an increase in circulatory disease mortality in astronauts following space radiation exposures. *Life Sci. Sp. Res.* **10**, 53–56 (2016). 2. CRaTER-web.sr.unh.edu/. 3. Zeitlin, C. *et al.* Update on Galactic Cosmic Ray Integral Flux Measurements in Lunar Orbit With CRaTER. *Sp. Weather* **17**, 1011–1017 (2019). 4. Spence, H. E. *et al.* Relative contributions of galactic cosmic rays and lunar proton ‘albedo’ to dose and dose rates near the Moon. *Sp. Weather* **11**, 643–650 (2013). 5. Zhang, S. *et al.* First measurements of the radiation dose on the lunar surface. *Sci. Adv.* **6**, (2020). 6. Hassler, D. M. *et al.* Mars’ surface radiation environment measured with the Mars science laboratory’s curiosity rover. *Science* **353**, 1080–1084 (2014). 7. Zeitlin, C. *et al.* Measurements of energetic particle radiation in transit to Mars on the Mars Science Laboratory. *Science* **340**, 1080–1084 (2013). 8. Mertens, C. J. Overview of the Radiation Dosimetry Experiment (RaD-X) flight mission. *Sp. Weather* **14**, 921–934 (2016).

**Supplementary Data 1.** Differential expression (fold-change flight vs ground or basal controls) of genes in mouse datasets GLDS 243, 244, 246, 247 and 248 identified as also showing radiation responsive transcription from the RadAtlas database.
